# Supplementary material for: Cation-exchange and oxygen vacancies triggered capacity in hierarchical α-Ni1−xCuxMoO4@CC flexible electrodes for energy-storage applications
Source: Royal Society of Chemistry journal article supplement (doi:10.1039/d2ta06690d), 2022-01-01
Supplement: d2ta06690d1.pdf [file d2ta06690d1.pdf]

## Supporting Information

### **Cation-exchange and oxygen vacancies triggered capacity in hierarchical $\alpha$ - $\text{Ni}_{1-x}\text{Cu}_x\text{MoO}_4$ @CC flexible electrodes for energy-storage applications**

*Sk. Khaja Hussain,<sup>†,‡,#</sup> B. N. Vamsi Krishna,<sup>†,#</sup> and Jae Su Yu <sup>†,\*</sup>*

<sup>†</sup>*Department of Electronic Engineering, Institute for Wearable Convergence Electronics, Kyung Hee University, 1 Seocheon-dong, Giheung-gu, Yongin-si, Gyeonggi-do 446-701, Republic of Korea*

<sup>‡</sup>*Nanosensor Research Institute, Hanyang University, 55 Hanyangdaehak-ro, Sangnok-gu, Ansan, Gyeonggi-do 15588, Republic of Korea*

#### *Author Information*

<sup>#</sup> *S.K.H. and B.N.V.K contributed equally to this work.*

<sup>\*</sup>*Corresponding author*

*E-mail: [jsyu@khu.ac.kr](mailto:jsyu@khu.ac.kr)*

## Chemicals and material characterizations

The chemicals of nickel acetate ( $\text{Ni}(\text{CH}_3\text{CO}_2)_2 \cdot 4\text{H}_2\text{O}$ ), copper acetate ( $\text{Cu}(\text{CH}_3\text{CO}_2)_2 \cdot x\text{H}_2\text{O}$ ), and ammonium molybdate tetrahydrate ( $(\text{NH}_4)_6\text{Mo}_7\text{O}_{24} \cdot 4\text{H}_2\text{O}$ ) were purchased by Sigma Aldrich Co., South Korea. Polyvinylidene fluoride (PVDF;  $-(\text{C}_2\text{H}_2\text{F}_2)_n-$ ) and N-methyl-2-pyrrolidone (NMP;  $\text{C}_5\text{H}_9\text{NO}$ ) were received from Daejung Chemicals Ltd., South Korea. The above chemicals were utilized in our experiments without any alterations in their purity.

The electrode samples were characterized by X-ray diffraction (XRD) analysis ( $\text{Cu K}\alpha$  ( $\lambda = 1.54056 \text{ \AA}$ )) through the Mac Science M18XHF-SRA instrument to find out the pure crystallinity. High-resolution Raman spectroscopy (Research Leica DM250) with 514 nm laser excitation was used to measure the Raman spectra of the electrodes. Field-emission scanning electron microscope (FE-SEM; LEO SUPRA 55 Carl Zeiss) equipped with energy-dispersive X-ray spectroscopy (EDS) was used to investigate the surface morphologies of the electrodes. X-ray photoelectron spectroscopy (XPS; Thermo Multi-Lab 2000 System) was employed to identify the charges of the metal ions. Electron paramagnetic resonance spectroscopy (Bruker (EMXplus-9.5/2.7)) was employed to identify the oxygen vacancies.

## Electrochemical analysis

The electrochemical data for the flexible  $\alpha\text{-NiMoO}_4$ @carbon cloth (CC) and  $\alpha\text{-Ni}_{1-x}\text{Cu}_x\text{MoO}_4$ @CC ( $x = 1, 3, 5, \text{ and } 7 \text{ mol\%}$ ) electrodes were collected by IviumStat; IVIUM Technologies instrument in a three-electrode electrochemical system ( $25 \text{ }^\circ\text{C}$ ). The loading masses of the materials on the CC in a  $1 \times 1 \text{ cm}^2$  area were  $\sim 3.1 \pm 0.05 \text{ mg cm}^{-2}$  referred to as a working electrode. Ag/AgCl is the reference electrode and Pt wire is the counter electrode.

Before electrochemical analysis, a freshly made 1 M aqueous KOH electrolyte solution was used.

**Table S1.** Three-electrode electrochemical performance and two-electrode stability, energy, and power density comparisons of the designed  $\alpha\text{-Ni}_{0.95}\text{Cu}_{0.05}\text{MoO}_4@\text{CC}$  electrode and FHS device with the previously published reports of molybdenum and nickel-based composites.

| Composite material                                    | Preparation method                                  | Electrolyte             | Three-electrode performance                      | Cycling stability @ Retention     | Energy and power densities                                      | Ref. |
|-------------------------------------------------------|-----------------------------------------------------|-------------------------|--------------------------------------------------|-----------------------------------|-----------------------------------------------------------------|------|
| CoMoO <sub>4</sub> -NiMoO <sub>4</sub> NTs            | Two-step hydrothermal method                        | 3 M KOH                 | 751 F g <sup>-1</sup> at 1 A g <sup>-1</sup>     | 2000 cycles @ (94%)               | E (30.86 Wh kg <sup>-1</sup> )<br>P (4.85 kW kg <sup>-1</sup> ) | S1   |
| Carbon sphere@NiMoO <sub>4</sub>                      | A hydrothermal method                               | 2M NaOH                 | 268.8 F g <sup>-1</sup> at 1 A g <sup>-1</sup>   | 2000 cycles @ (88.4%)             | -                                                               | S2   |
| NiMoO <sub>4</sub> -PANI nanocomposite                | A solvothermal method                               | PVA-KOH gel electrolyte | 1214 F g <sup>-1</sup> at 1 A g <sup>-1</sup>    | 5000 cycles @ (98.6%)             | E (30.07 Wh kg <sup>-1</sup> )<br>P (240 W kg <sup>-1</sup> )   | S3   |
| NiMoO <sub>4</sub> nanorods                           | A facile solvothermal method                        | 3 M KOH                 | 670 F g <sup>-1</sup> at 0.3 A g <sup>-1</sup>   | 3000 cycles @ (88%)               | -                                                               | S4   |
| NiMoO <sub>4</sub> /CoMoO <sub>4</sub> nanorod arrays | Hydrothermal and electrochemical deposition methods | 1 M KOH                 | 778.1 F g <sup>-1</sup> at 0.5 A g <sup>-1</sup> | -                                 | E (33.1 Wh kg <sup>-1</sup> )<br>P (3195 W kg <sup>-1</sup> )   | S5   |
| NiMoO <sub>4</sub> nanorods on Ni foam                | Hydrothermal route                                  | 6 M KOH                 | 594 F g <sup>-1</sup> at 1 A g <sup>-1</sup>     | 1000 cycles @ (56%)               | E (18 Wh kg <sup>-1</sup> )<br>P (704 W kg <sup>-1</sup> )      | S6   |
| NiMoO <sub>4</sub> nanospheres on Ni-foam             | Hydrothermal route                                  | 3 M KOH                 | 974.4 F g <sup>-1</sup> at 1 A g <sup>-1</sup>   | 2000 cycles @ 5 A g <sup>-1</sup> | E (20.1 Wh kg <sup>-1</sup> )<br>P (2100 W kg <sup>-1</sup> )   | S7   |

|                                                           |                                 |                                       |                                                   |                       |                                                               |     |
|-----------------------------------------------------------|---------------------------------|---------------------------------------|---------------------------------------------------|-----------------------|---------------------------------------------------------------|-----|
| NiMoO <sub>4</sub> -Ag/rGO                                | Hydrothermal route              | 6 M KOH                               | 566.4 C g <sup>-1</sup> at 1 A g <sup>-1</sup>    | 8000 cycles @ (73.3%) | E (40.98 Wh kg <sup>-1</sup> )<br>P (800 W kg <sup>-1</sup> ) | S8  |
| CoMoO <sub>4</sub> -NiMoO <sub>4</sub> Nanotubes          | Hydrothermal method             | 2 M KOH                               | 1079 F g <sup>-1</sup> at 5 A g <sup>-1</sup>     | 1000 cycles @ (98.4%) | E (33 Wh kg <sup>-1</sup> )<br>P (6000 W kg <sup>-1</sup> )   | S9  |
| CoMoO <sub>4</sub> -NiMoO <sub>4</sub> ·xH <sub>2</sub> O | Chemical co-precipitation       | 2 M KOH                               | 1039 F g <sup>-1</sup> at 2.5 mA cm <sup>-2</sup> | 1000 cycles @ (75.1%) | -                                                             | S10 |
| NiMoO <sub>4</sub> @NiS <sub>2</sub> /MoS <sub>2</sub>    | Hydrothermal method             | 6 M KOH                               | 970 F g <sup>-1</sup> at 5 A g <sup>-1</sup>      | 5000 cycles @ (60%)   | E (26.8 Wh kg <sup>-1</sup> )<br>P (700 W kg <sup>-1</sup> )  | S11 |
| MoO <sub>3</sub> nanobelts                                | A facile hydrothermal method    | 0.5 M Li <sub>2</sub> SO <sub>4</sub> | 369 F g <sup>-1</sup> at 0.1 A g <sup>-1</sup>    | 500 cycles @ (95%)    | -                                                             | S12 |
| MoO <sub>3</sub> nanorods                                 | A facile hydrothermal method    | 1 M Na <sub>2</sub> SO <sub>4</sub>   | 214 F g <sup>-1</sup> at 0.1 A g <sup>-1</sup>    | 1000 cycles @ (71.7%) | -                                                             | S13 |
| Layered MoO <sub>3</sub> @C                               | Calcination process             | 1 M H <sub>2</sub> SO <sub>4</sub>    | 331 F g <sup>-1</sup> at 1 A g <sup>-1</sup>      | 1000 cycles @ (87.9%) | -                                                             | S14 |
| rGO-wrapped MoO <sub>3</sub> composites                   | A novel and simple method       | 1 M H <sub>2</sub> SO <sub>4</sub>    | 617 F g <sup>-1</sup> at 1 A g <sup>-1</sup>      | 6000 cycles @ (87.5%) | -                                                             | S15 |
| ZnO@MoO <sub>3</sub> core/shell nanocables                | A simple electrochemical method | 1 M Na <sub>2</sub> SO <sub>4</sub>   | 236 F g <sup>-1</sup> at 5 mV s <sup>-1</sup>     | 1000 cycles @ (90%)   | -                                                             | S16 |

|                                                                    |                                                  |                                    |                                                   |                       |                                                                 |     |
|--------------------------------------------------------------------|--------------------------------------------------|------------------------------------|---------------------------------------------------|-----------------------|-----------------------------------------------------------------|-----|
| MoO <sub>3</sub> @PANI nanobelts                                   | A simple and green approach                      | 1 M H <sub>2</sub> SO <sub>4</sub> | 714 F g <sup>-1</sup> at 1 mV s <sup>-1</sup>     | 3000 cycles @ (76.7%) | -                                                               | S17 |
| WS <sub>2</sub> /α-NiMoO <sub>4</sub>                              | Microwave hydrothermal and calcination processes | -                                  | 460 F g <sup>-1</sup> at 1 A g <sup>-1</sup>      | 2000 cycles @ (92%)   | -                                                               | S18 |
| NcSe@NMO@rGO-NF                                                    | Hydrothermal method                              | 2 M KOH                            | 396.1 mAh g <sup>-1</sup> at 1 A g <sup>-1</sup>  | 8000 cycles @ (89.4%) | E (63.2 Wh kg <sup>-1</sup> )<br>P (7983.5 W kg <sup>-1</sup> ) | S19 |
| NiMoO <sub>4</sub> arrays                                          | Hydrothermal and calcination method              | 2 M KOH                            | -                                                 | 4000 cycles @ (73.4%) | E (53.8 Wh kg <sup>-1</sup> )<br>P (239 W kg <sup>-1</sup> )    | S20 |
| CoMoO <sub>4</sub> @NiMoO <sub>4</sub> core-shell nanosheet arrays | A facile two-step hydrothermal method            | 2 M KOH                            | -                                                 | 3000 cycles @ (95%)   | E (28.7 Wh kg <sup>-1</sup> )<br>P (267 W kg <sup>-1</sup> )    | S21 |
| NiMoO <sub>4</sub> nanoparticles//AC                               | Calcination                                      | 6 M KOH                            | 1438 F g <sup>-1</sup> at 1 A g <sup>-1</sup>     | 3000 cycles @ (92%)   | E (30 Wh kg <sup>-1</sup> )<br>P (403 W kg <sup>-1</sup> )      | S22 |
| Co <sub>3</sub> O <sub>4</sub> @NiMoO <sub>4</sub> NSA//AC         | Hydrothermal reaction                            | 2 M KOH                            | 1526 F g <sup>-1</sup> at 3 mA cm <sup>-2</sup>   | -                     | E (37.8 Wh kg <sup>-1</sup> )<br>P (482 W kg <sup>-1</sup> )    | S23 |
| NiMoO <sub>4</sub>                                                 | Hydrothermal in situ diffusion reaction          | 2 M KOH                            | 864 F g <sup>-1</sup> at 1 A g <sup>-1</sup>      | 1000 cycles @ (71%)   | -                                                               | S24 |
| CoMoO <sub>4</sub> -NiMoO <sub>4</sub> ·xH <sub>2</sub> O          | Chemical co-precipitation method                 | 2 M KOH                            | 1039 F g <sup>-1</sup> at 2.5 mA cm <sup>-2</sup> | 1000 cycles @ (72.3%) | -                                                               | S25 |

|                                                                                    |                                                     |                                       |                                                                                   |                                                   |                                                                  |                              |
|------------------------------------------------------------------------------------|-----------------------------------------------------|---------------------------------------|-----------------------------------------------------------------------------------|---------------------------------------------------|------------------------------------------------------------------|------------------------------|
| P-doped<br>$\text{Co}_{0.21}\text{Ni}_{0.79}\text{MoO}_4\text{-n}$                 | Calcination                                         | 2 M<br>KOH                            | 1127 F g <sup>-1</sup><br>at 0.5 A g <sup>-1</sup>                                | -                                                 | E (49.2 Wh kg <sup>-1</sup> )<br>P (747.7 W kg <sup>-1</sup> )   | S26                          |
| PCNS@Co <sub>x</sub> Ni <sub>1-x</sub><br>MoO <sub>4</sub>                         | A<br>hydrothermal<br>process                        | 2 M<br>KOH                            | 1127 F g <sup>-1</sup><br>at 0.5 A g <sup>-1</sup>                                | 5000 cycles<br>@ (101%)                           | E (36.7 Wh kg <sup>-1</sup> )<br>P (346.4 W kg <sup>-1</sup> )   | S27                          |
| Co <sub>3</sub> O <sub>4</sub> @NiMoO <sub>4</sub><br>flower-like hybrid<br>arrays | Hydrothermal<br>and post-<br>annealing<br>treatment | 2 M<br>KOH                            | 636.8 C g <sup>-1</sup><br>at 5 mA cm <sup>-2</sup>                               | 2000 cycles<br>@ (84.1%)                          | E (58.5 Wh kg <sup>-1</sup> )<br>P (389 W kg <sup>-1</sup> )     | S28                          |
| MoO <sub>3</sub> hybrids                                                           | A sol-gel<br>method                                 | 1 M<br>H <sub>2</sub> SO <sub>4</sub> | 135 F g <sup>-1</sup><br>at 1.3 A g <sup>-1</sup>                                 | 1000 cycles<br>@ (82%)                            | -                                                                | S29                          |
| CoMoO <sub>4</sub> @PPy<br>NHs                                                     | -                                                   | 2 M<br>KOH                            | 1203 F g <sup>-1</sup><br>at 2 A g <sup>-1</sup>                                  | 5000 cycles<br>@ (96%)                            | E (40.3 Wh kg <sup>-1</sup> )<br>P (749 W kg <sup>-1</sup> )     | S30                          |
| NiMoO <sub>4-x</sub> @C                                                            | An annealing<br>process                             | 2 M<br>KOH                            | 1720 F g <sup>-1</sup><br>at 1 mA cm <sup>-2</sup>                                | 6000 cycles<br>@ (84.5%)                          | E (51.6 Wh kg <sup>-1</sup> )<br>P (203.95 W kg <sup>-1</sup> )  | S31                          |
| $\alpha$ -<br>Ni <sub>0.95</sub> Cu <sub>0.05</sub> MoO <sub>4</sub><br>@CC        | <b>A facile<br/>hydrothermal<br/>method</b>         | <b>1 M<br/>KOH</b>                    | <b>342 C g<sup>-1</sup><br/>(1088 F g<sup>-1</sup>)<br/>at 1 A g<sup>-1</sup></b> | <b>FAS device<br/>@10000<br/>cycles<br/>(91%)</b> | <b>E (83 Wh kg<sup>-1</sup>)<br/>P (10.5 kW kg<sup>-1</sup>)</b> | <b>Prese<br/>nt<br/>Work</b> |

## References

- S1. Q. Yang and S.-Y. Lin, *RSC Adv.*, 2016, **6**, 10520-10526.
- S2. C. Wei, Y. Huang, J. Yan, X. Chen and X. Zhang, *Ceram. Int.*, 2016, **42**, 15694-15700.
- S3. H. Gao, F. Wu, X. Wang, C. Hao and C. Ge, *Int. J. Hydrogen Energy*, 2018, **43**, 18349-18362.
- S4. E. R. Ezeigwe, P. S. Khiew, C. W. Siong, I. Kong and M. T. T. Tan, *Ceram. Int.*, 2017, **43**, 13772-13780.
- S5. B. Yu, G. Jiang, W. Xu, C. Cao, Y. Liu, N. Lei, U. Evariste and P. Ma, *J. Alloys Compd.*, 2019, **799**, 415-424.
- S6. N. S. Neeraj, B. Mordina, A. K. Srivastava, K. Mukhopadhyay and N. E. Prasad, *Appl. Surf. Sci.*, 2019, **473**, 807-819.
- S7. D. Cai, D. Wang, B. Liu, Y. Wang, Y. Liu, L. Wang, H. Li, H. Huang, Q. Li and T. Wang, *ACS Appl. Mater. Interfaces*, 2013, **5**, 12905-12910.
- S8. B. Huang, D. Yao, J. Yuan, Y. Tao, Y. Yin, G. He and H. Chen, *J. Colloid Interface Sci.*, 2022, **606**, 1652-1661.
- S9. Z. Yin, Y. Chen, Y. Zhao, C. Li, C. Zhu and X. Zhang, *J. Mater. Chem. A*, 2015, **3**, 22750-22758.
- S10. M.-C. Liu, L.-B. Kong, C. Lu, X.-J. Ma, X.-M. Li, Y.-C. Luo and L. Kang, *J. Mater. Chem. A*, 2013, **1**, 1380-1387.
- S11. D. Chen, M. Lu, L. Li, D. Cai, J. Li, J. Cao and W. Han, *J. Mater. Chem. A*, 2019, **7**, 21759-21765.
- S12. J. Jiang, J. Liu, S. Peng, D. Qian, D. Luo, Q. Wang, Z. Tian and Y. Liu, *J. Mater. Chem. A*, 2013, **1**, 2588-2594.
- S13. Z. Cui, W. Yuan and C. M. Li, *J. Mater. Chem. A*, 2013, **1**, 12926-12931.
- S14. H. Ji, X. Liu, Z. Liu, B. Yan, L. Chen, Y. Xie, C. Liu, W. Hou and G. Yang, *Adv. Funct. Mater.*, 2015, **25**, 1886-1894.
- S15. X. Cao, B. Zheng, W. Shi, J. Yang, Z. Fan, Z. Luo, X. Rui, B. Chen, Q. Yan and H. Zhang, *Adv. Mater.*, 2015, **27**, 4695-4701.
- S16. G.-R. Li, Z.-L. Wang, F.-L. Zheng, Y.-N. Ou and Y.-X. Tong, *J. Mater. Chem.*, 2011, **21**, 4217-4221.
- S17. F. Jiang, W. Li, R. Zou, Q. Liu, K. Xu, L. An and J. Hu, *Nano Energy*, 2014, **7**, 72-79.
- S18. S. K. Ray, B. Pant, M. Park, J. Hur and S. W. Lee, *Ceram. Int.*, 2020, **46**, 19022-19027.
- S19. J. Acharya, B. Pant, G. P. Ojha and M. Park, *J. Mater. Chem. A*, 2022, **10**, 7999-8014.
- S20. C. Qing, Y. Liu, X. Sun, X. OuYang, H. Wang, D. Sun, B. Wang, Q. Zhou, L. Xu and Y. Tang, *RSC Adv.*, 2016, **6**, 67785-67793.
- S21. Z. Zhang, H. Zhang, X. Zhang, D. Yu, Y. Ji, Q. Sun, Y. Wang and X. Liu, *J. Mater. Chem. A*, 2016, **4**, 18578-18584.
- S22. V. S. Budhiraju, R. Kumar, A. Sharma and S. Sivakumar, *Electrochim. Acta*, 2017, **238**, 337-348.
- S23. W. Hong, J. Wang, P. Gong, J. Sun, L. Niu, Z. Yang, Z. Wang and S. Yang, *J. Power Sources*, 2014, **270**, 516-525.
- S24. Z. Yin, S. Zhang, Y. Chen, P. Gao, C. Zhu, P. Yang and L. Qi, *J. Mater. Chem. A*, 2015, **3**, 739-745.
- S25. M.-C. Liu, L.-B. Kong, C. Lu, X.-J. Ma, X.-M. Li, Y.-C. Luo and L. Kang, *J. Mater. Chem. A*, 2013, **1**, 1380-1387.
- S26. T. Xing, Y. Ouyang, Y. Chen, L. Zheng, C. Wu and X. Wang, *J. Energy Storage*, 2020, **28**, 101248.
- S27. J. Lin, L. Yao, Z. Li, P. Zhang, W. Zhong, Q. Yuan and L. Deng, *Nanoscale*, 2019, **11**, 3281-3291.
- S28. Y. Zhang, Y. Yang, L. Mao, D. Cheng, Z. Zhan and J. Xiong, *Mater. Lett.*, 2016, **182**, 298-301.
- S29. Q. Mahmood, W. S. Kim and H. S. Park, *Nanoscale*, 2012, **4**, 7855-7860.
- S30. A. Liu and J. Tang, *Ceram. Int.*, 2020, **46**, 10893-10902.
- S31. P. Wang, X. Ding, R. Zhe, T. Zhu, C. Qing, Y. Liu and H.-E. Wang, *Nanomater.*, 2022, **12**, 1094.



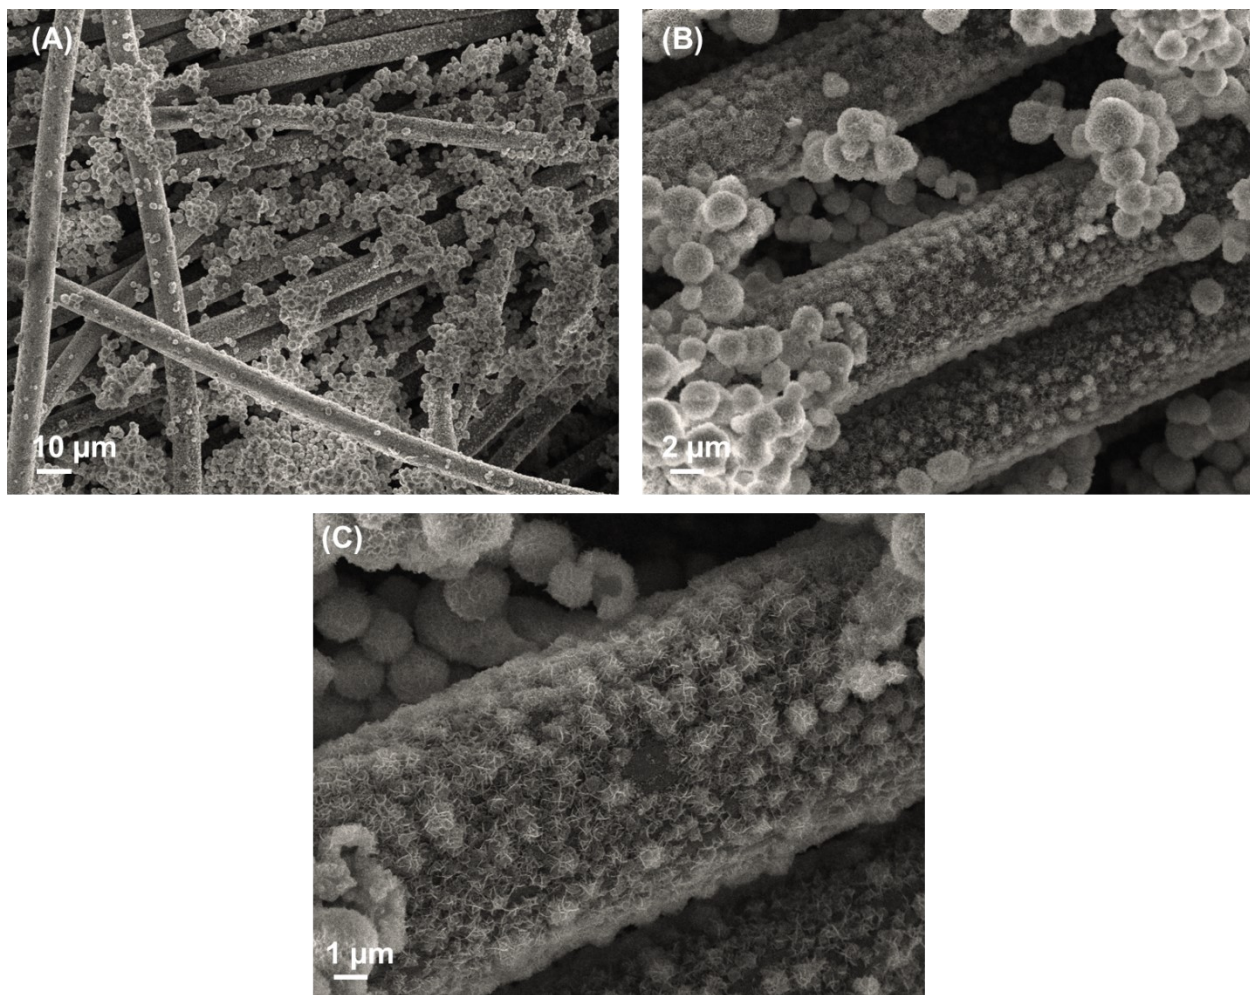

**Fig. S1.** (A-C) FE-SEM images of  $\alpha\text{-Ni}_{0.93}\text{Cu}_{0.07}\text{MoO}_4@\text{CC}$  electrode.

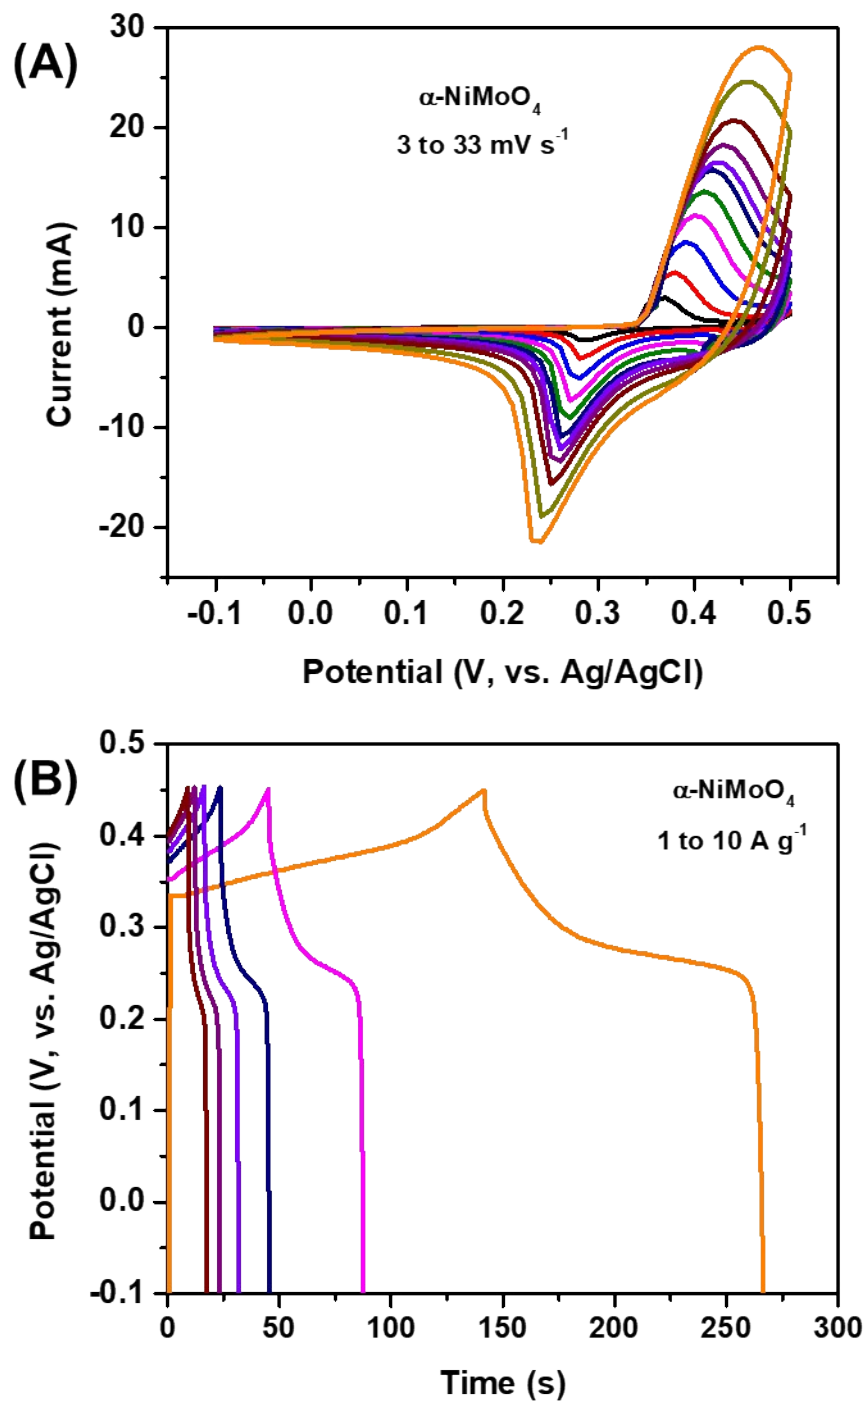

**Fig. S2.** (A) CV curves and (B) GCD profiles of the  $\alpha$ -NiMoO<sub>4</sub>@CC electrode at different scan rates (3 to 33 mV s<sup>-1</sup>) and current densities (1 to 10 A g<sup>-1</sup>), respectively.

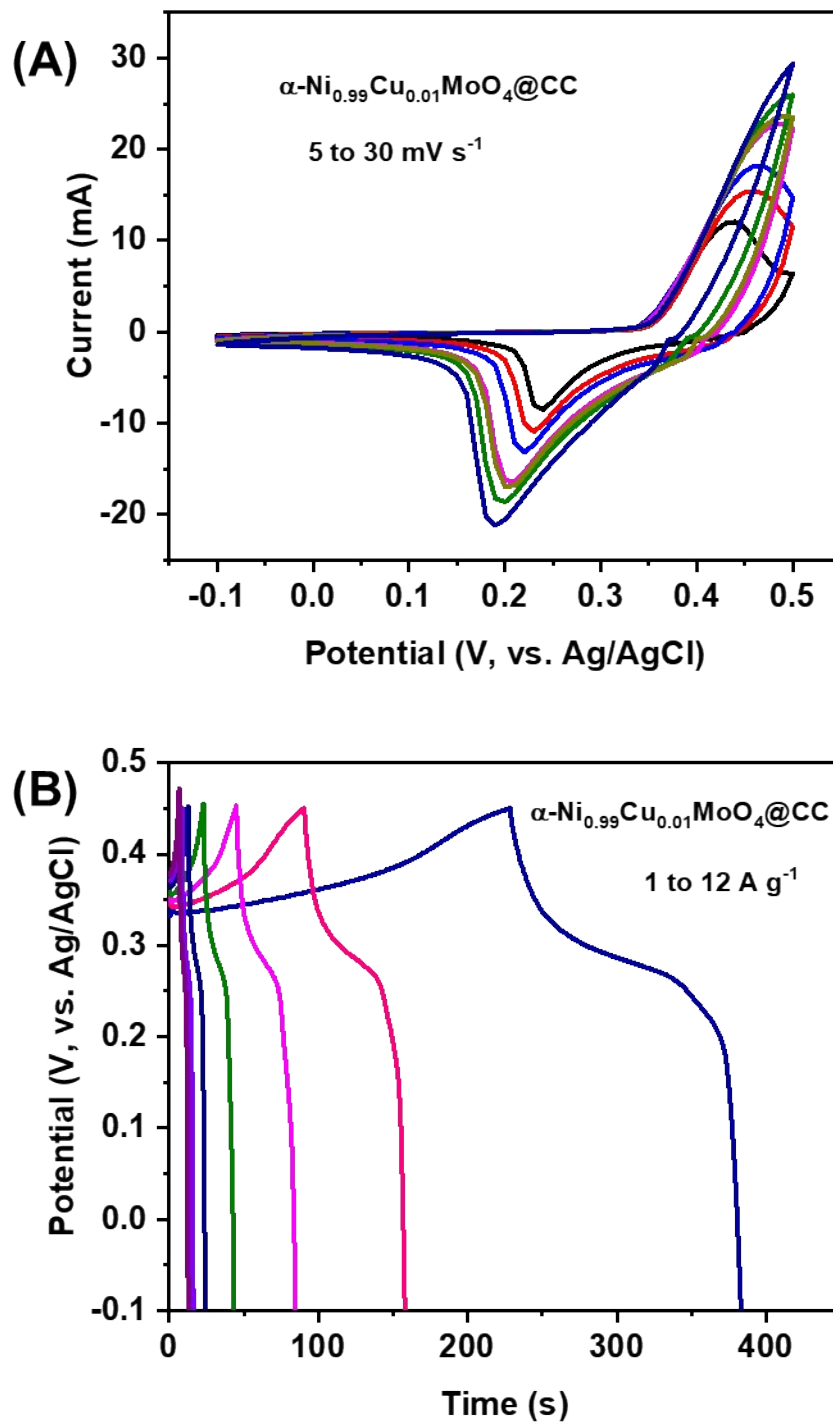

**Fig. S3.** (A) CV curves and (B) GCD profiles of the  $\alpha\text{-Ni}_{0.99}\text{Cu}_{0.01}\text{MoO}_4\text{@CC}$  electrode at different scan rates (3 to 30  $\text{mV s}^{-1}$ ) and current densities (1 to 12  $\text{A g}^{-1}$ ), respectively.

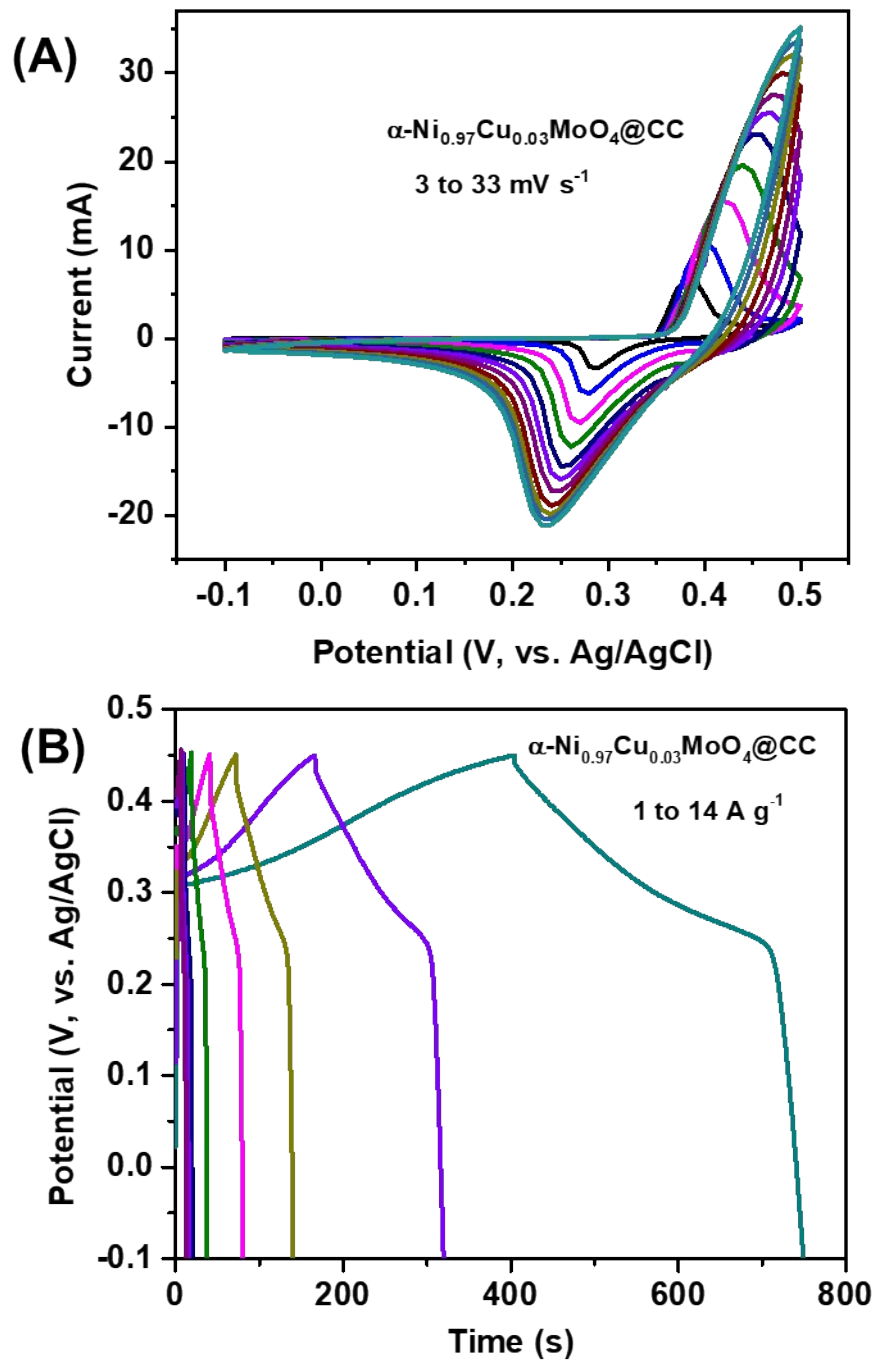

**Fig. S4.** (A) CV curves and (B) GCD profiles of the  $\alpha\text{-Ni}_{0.97}\text{Cu}_{0.03}\text{MoO}_4\text{@CC}$  electrode at different scan rates (3 to 33  $\text{mV s}^{-1}$ ) and current densities (1 to 12  $\text{A g}^{-1}$ ), respectively.

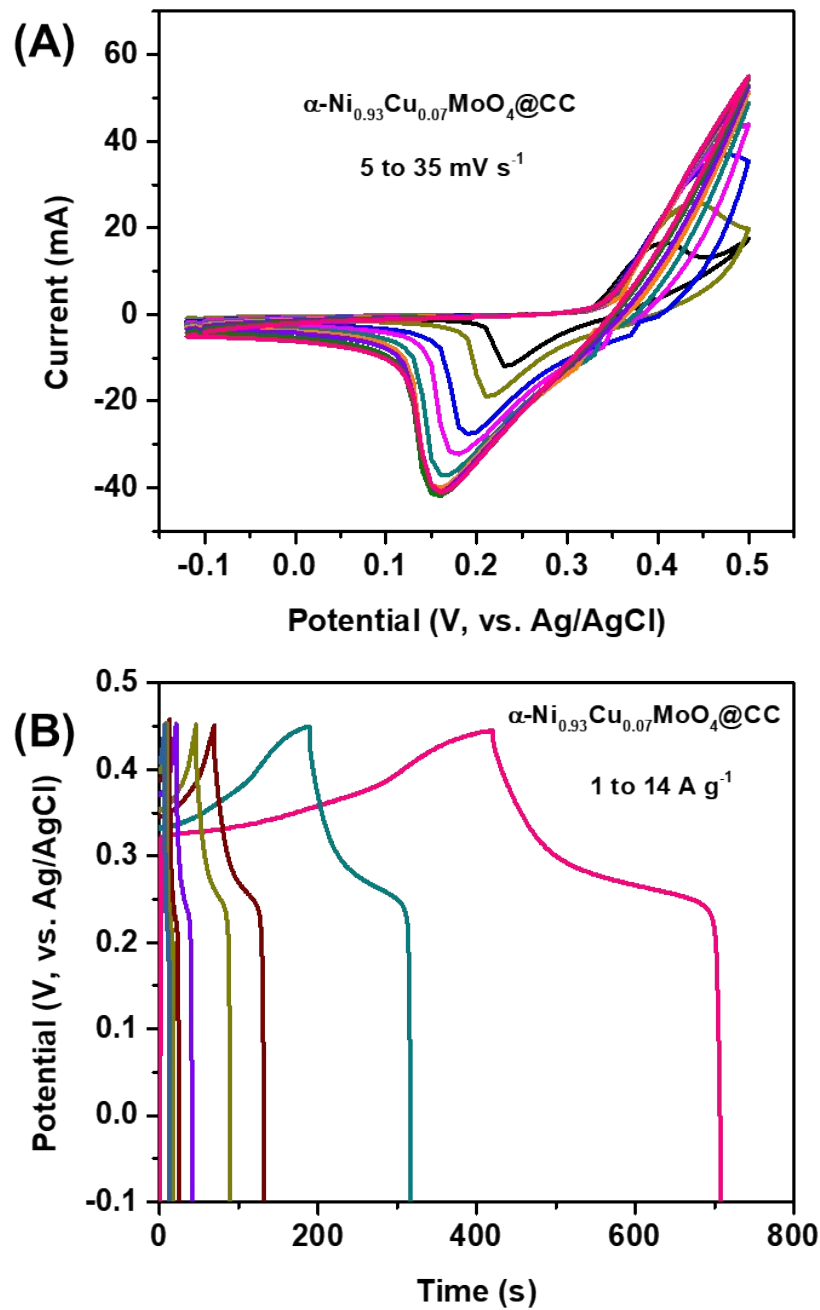

**Fig. S5.** (A) CV curves and (B) GCD profiles of the  $\alpha\text{-Ni}_{0.93}\text{Cu}_{0.07}\text{MoO}_4\text{@CC}$  electrode at different scan rates (3 to 33  $\text{mV s}^{-1}$ ) and current densities (1 to 12  $\text{A g}^{-1}$ ), respectively.

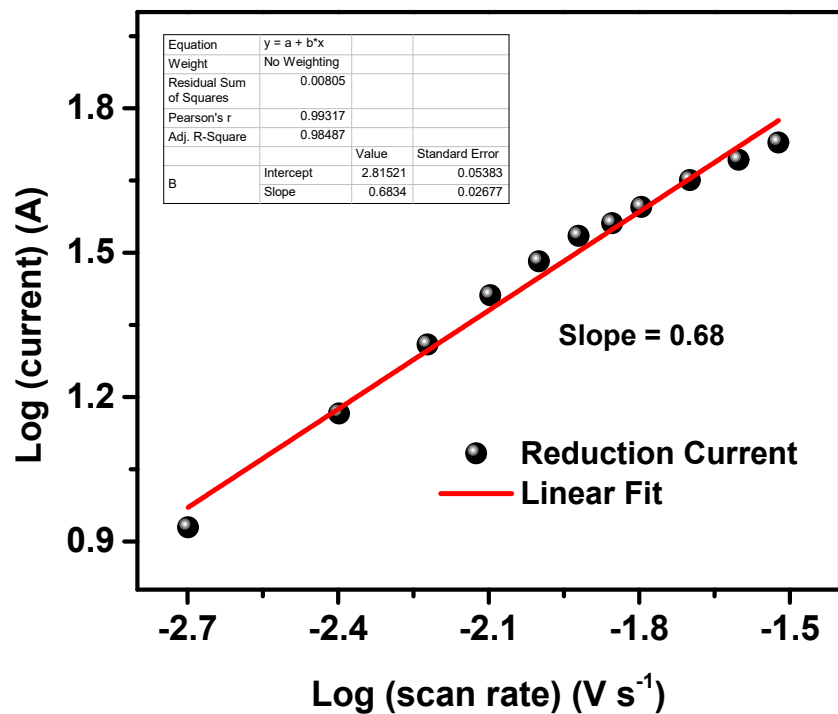

**Fig. S6.** Calculated  $b$  value of the  $\alpha$ -Ni<sub>0.95</sub>Cu<sub>0.05</sub>MoO<sub>4</sub>@CC electrode from the cathodic peak currents.

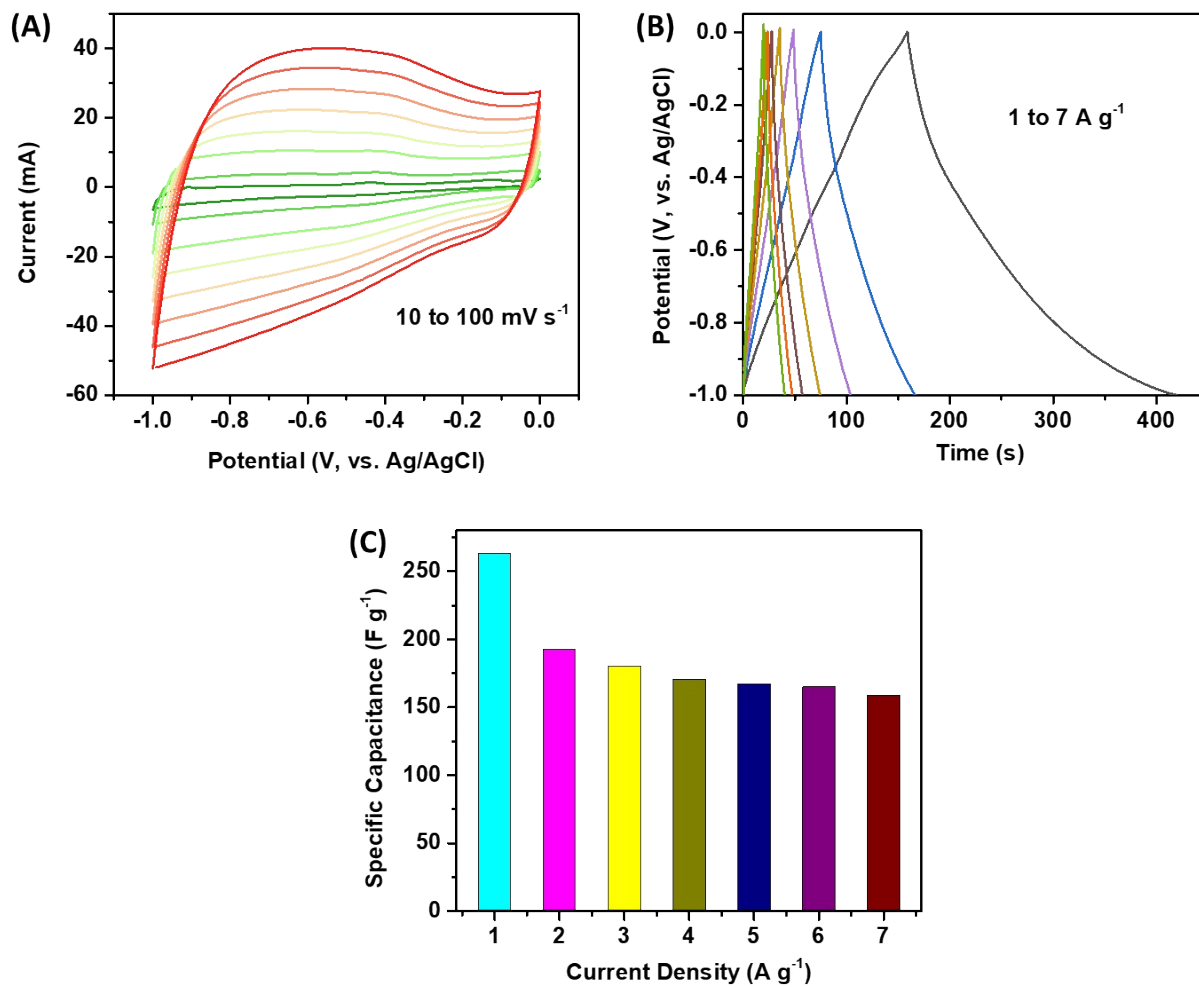

**Fig. S7.** (A) CV curves at different scan rates (10 to 100  $\text{mV s}^{-1}$ ), (B) GCD curves at different current densities (1 to 7  $\text{A g}^{-1}$ ), and (C)  $C_s$  values of the AC@CC electrode.

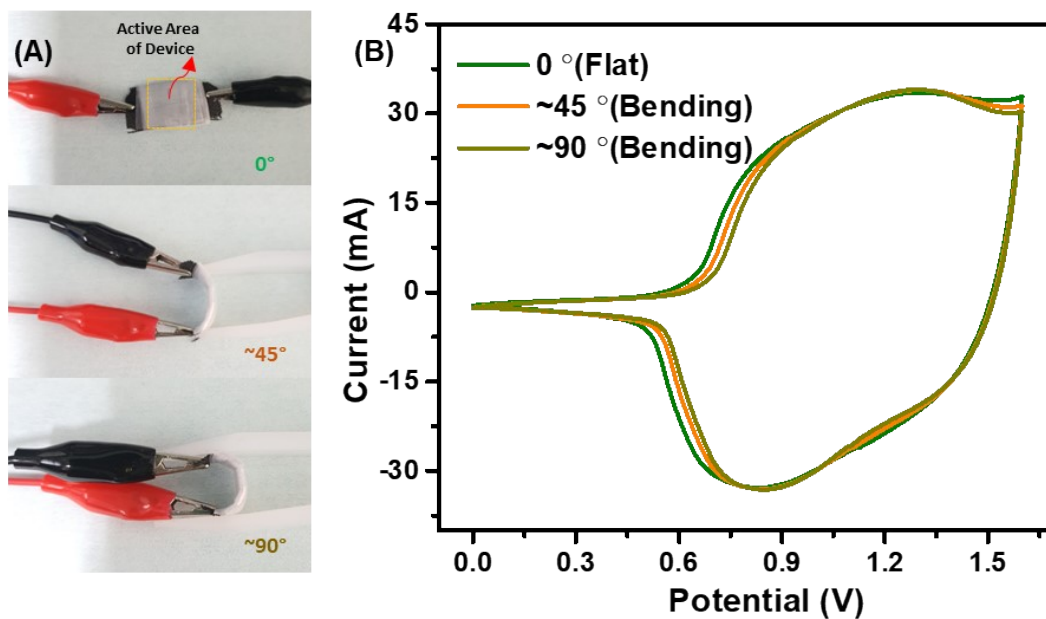

**Fig. S8.** (A) Digital photographic images. (B) CV curves (at  $50 \text{ mV s}^{-1}$ ) of the  $\alpha\text{-Ni}_{0.95}\text{Cu}_{0.05}\text{MoO}_4\text{@CC//AC@CC}$  FHS device in flat and bending positions.
